# Supplementary material for: Accuracy and consistency of intensity-based deformable image registration in 4DCT for tumor motion estimation in liver radiotherapy planning
Source: PubMed Central journal article supplement (PMC9269460; doi:10.1371/journal.pone.0271064), 2022-07-08
Supplement: pone.0271064.s006.pdf [file pone.0271064.s006.pdf]

## S6 Appendix

### Registration Errors per Patient

The registration errors were comprised in a single plot for all patients. For expanding this information the following figures offer patient specifics of registration errors (see S4 Fig) and registration errors of inpainting (see S5 Fig).

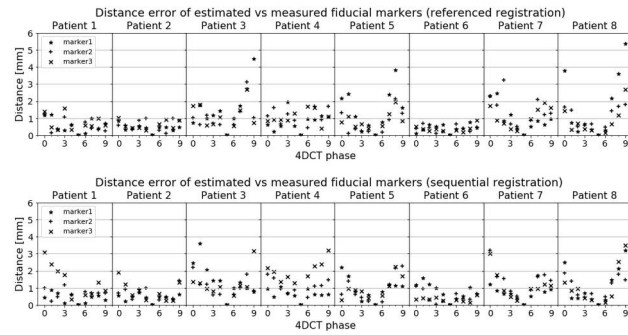

**S4 Fig. Registration errors per patient.** Top panel relates to reference registration and bottom panel relates to sequential registration.

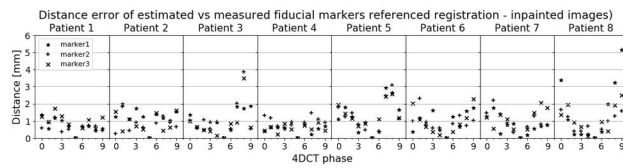

**S5 Fig. Registration errors with inpainting per patient.** Only referenced registration is applied for the inpainted images.
